# Supplementary material for: Effects of surface-modified silica nanoparticles attached graphene oxide using isocyanate-terminated flexible polymer chains on the mechanical properties of epoxy composites
Source: Royal Society of Chemistry journal article supplement (doi:10.1039/c4ta00584h), 2014-01-01
Supplement: c4ta00584h1.pdf [file c4ta00584h1.pdf]

## Effects of surface-modified silica nanoparticles attached graphene oxide using isocyanate-terminated flexible polymer chains on the mechanical properties of epoxy composites

Tongwu Jiang<sup>a</sup>, Tapas Kuila<sup>b</sup>, Nam Hoon Kim<sup>a</sup>, Joong Hee Lee<sup>a,c,\*</sup>

<sup>a</sup> Advanced Materials Research Institute for BIN Fusion Technology (BK Plus Global Program), Dept of BIN Fusion Technology, Chonbuk National University, Jeonju, Jeonbuk, 561-756, Republic of Korea. Fax: +82 63 2702341; Tel: +82 63 270 4803

<sup>b</sup> Surface Engineering and Tribology, CSIR-Central Mechanical Engineering Research Institute, Durgapur, West Bengal, 713209, India. Tel: +919647205077/+919474729574

<sup>c</sup> Center for Carbon Composites Materials, Dept of Polymer and Nano Science and Technology, Chonbuk National University, Jeonju, Jeonbuk, 561-756, Republic of Korea. Fax: +82 63 2702341; Tel: +82 63 270 4803; E-mail: [jhl@jbnu.ac.kr](mailto:jhl@jbnu.ac.kr)

\* Correspondence to: [jhl@jbnu.ac.kr](mailto:jhl@jbnu.ac.kr) (J. H. Lee),

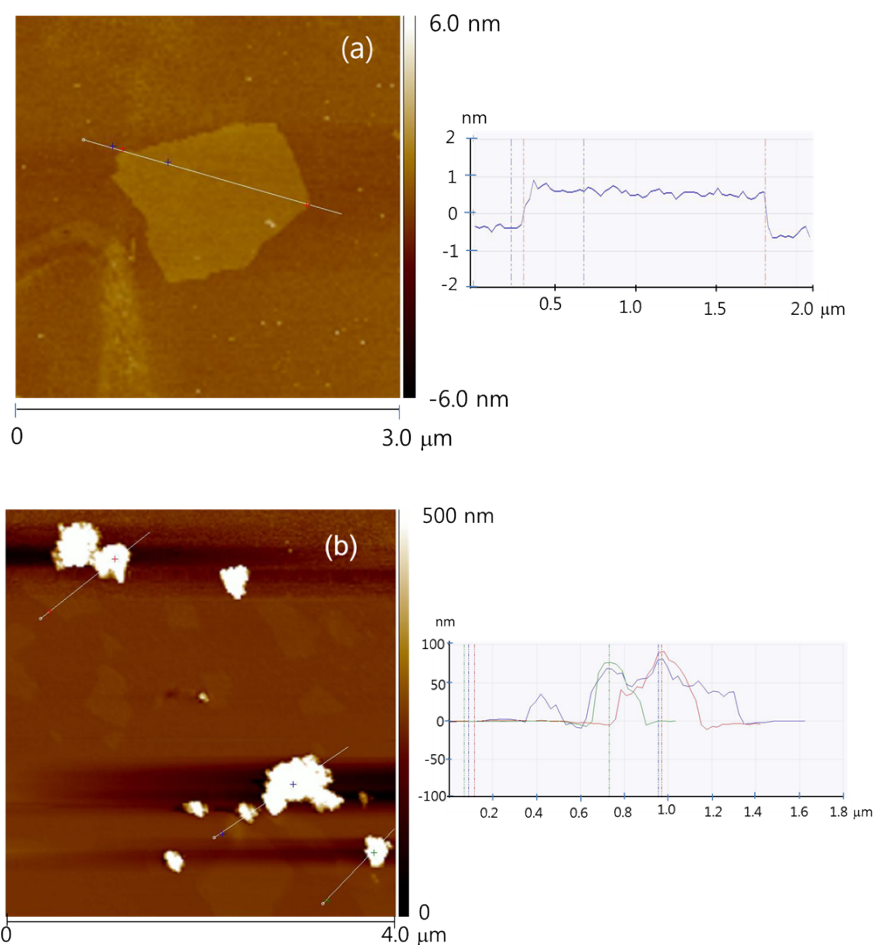

**Fig. S1** AFM images of (a) GO and (b) SATPGO<sub>2</sub>

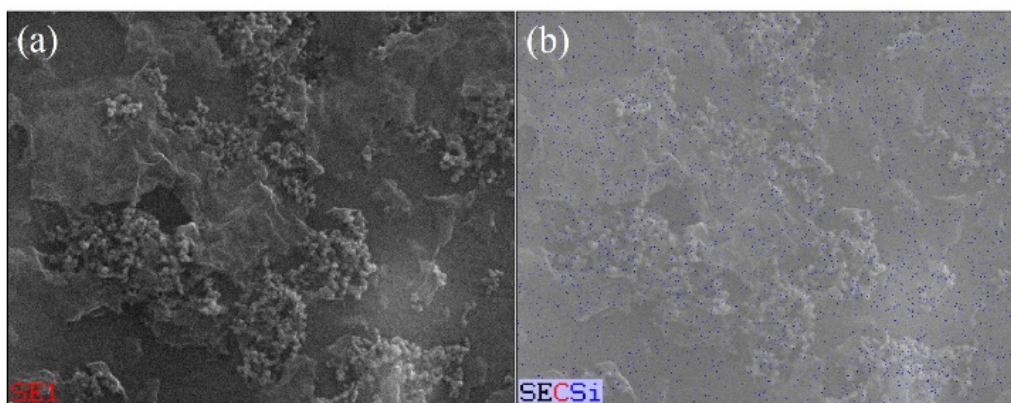

**Fig. S2.** (a) FE-SEM images of SATPGO<sub>2</sub> and (b) Si element mapping.

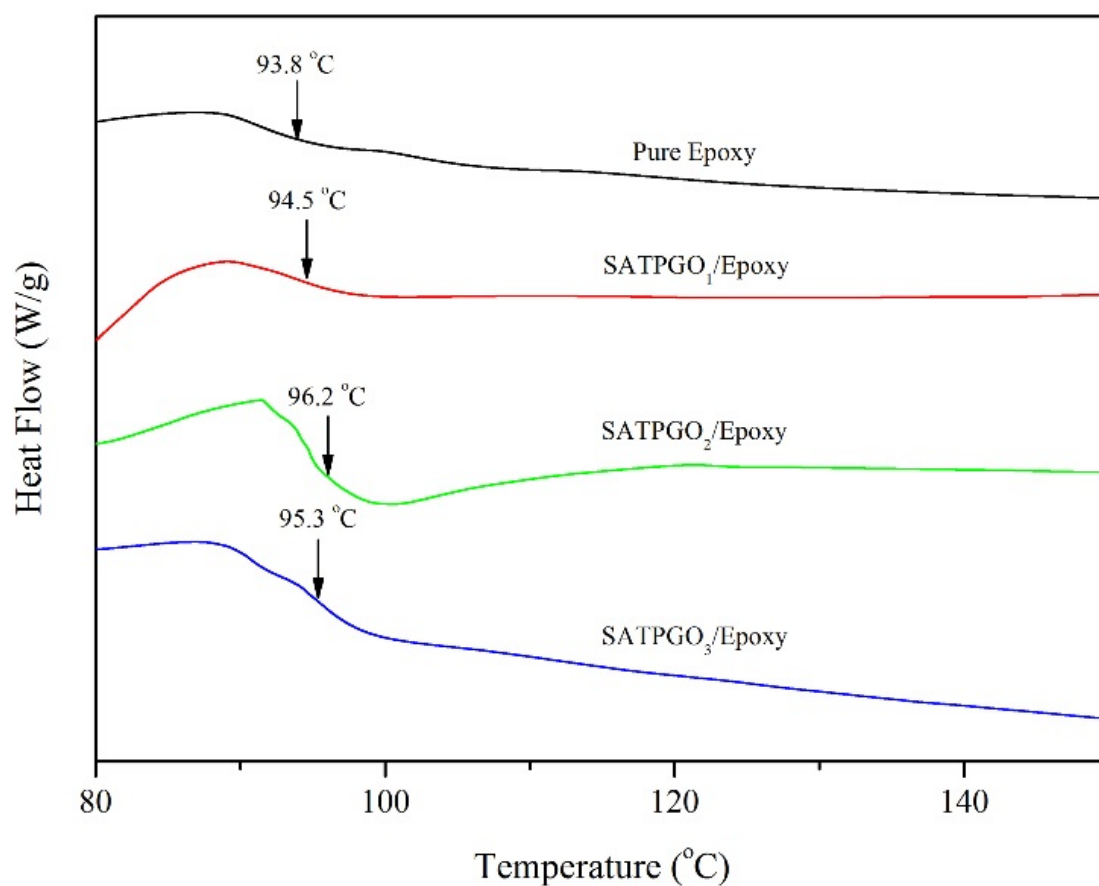

**Fig. S3** DSC thermograms for pure epoxy and SATPGO<sub>1</sub> (0.5 wt%)/epoxy, SATPGO<sub>2</sub> (0.5 wt%)/epoxy and SATPGO<sub>3</sub> (0.5 wt%)/epoxy.

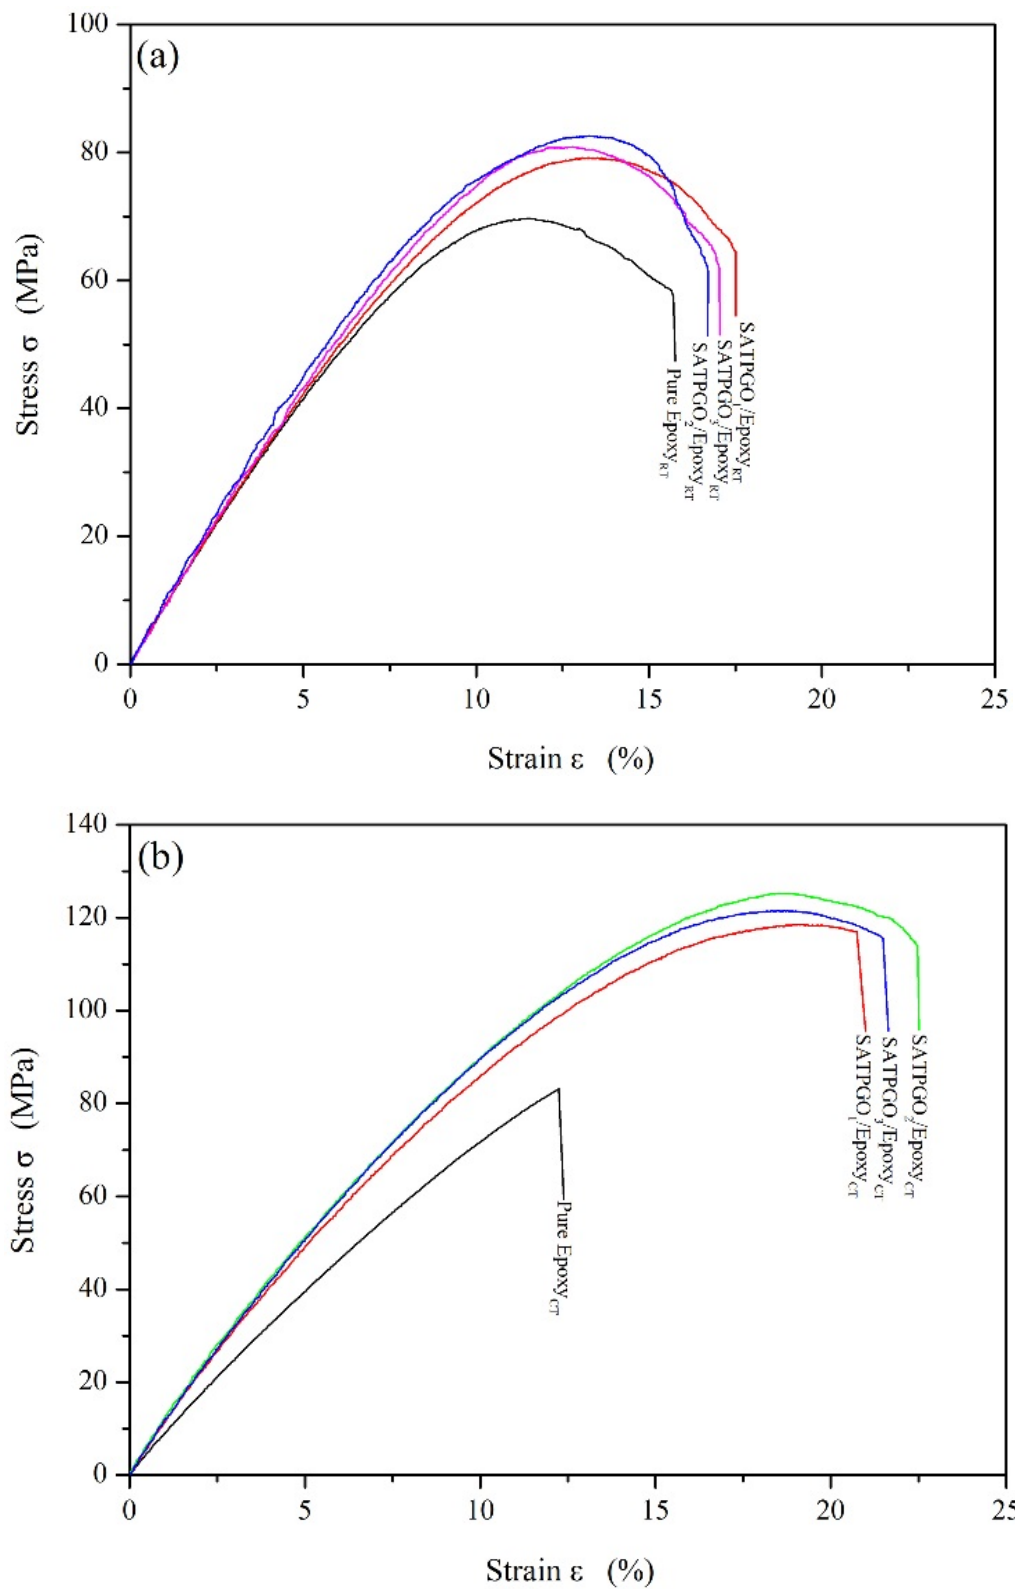

**Fig. S4** Stress-strain curves of pure epoxy, SATPGO (0.5 wt%) /epoxy composites filled epoxy composites at (a) RT and (b) CT.

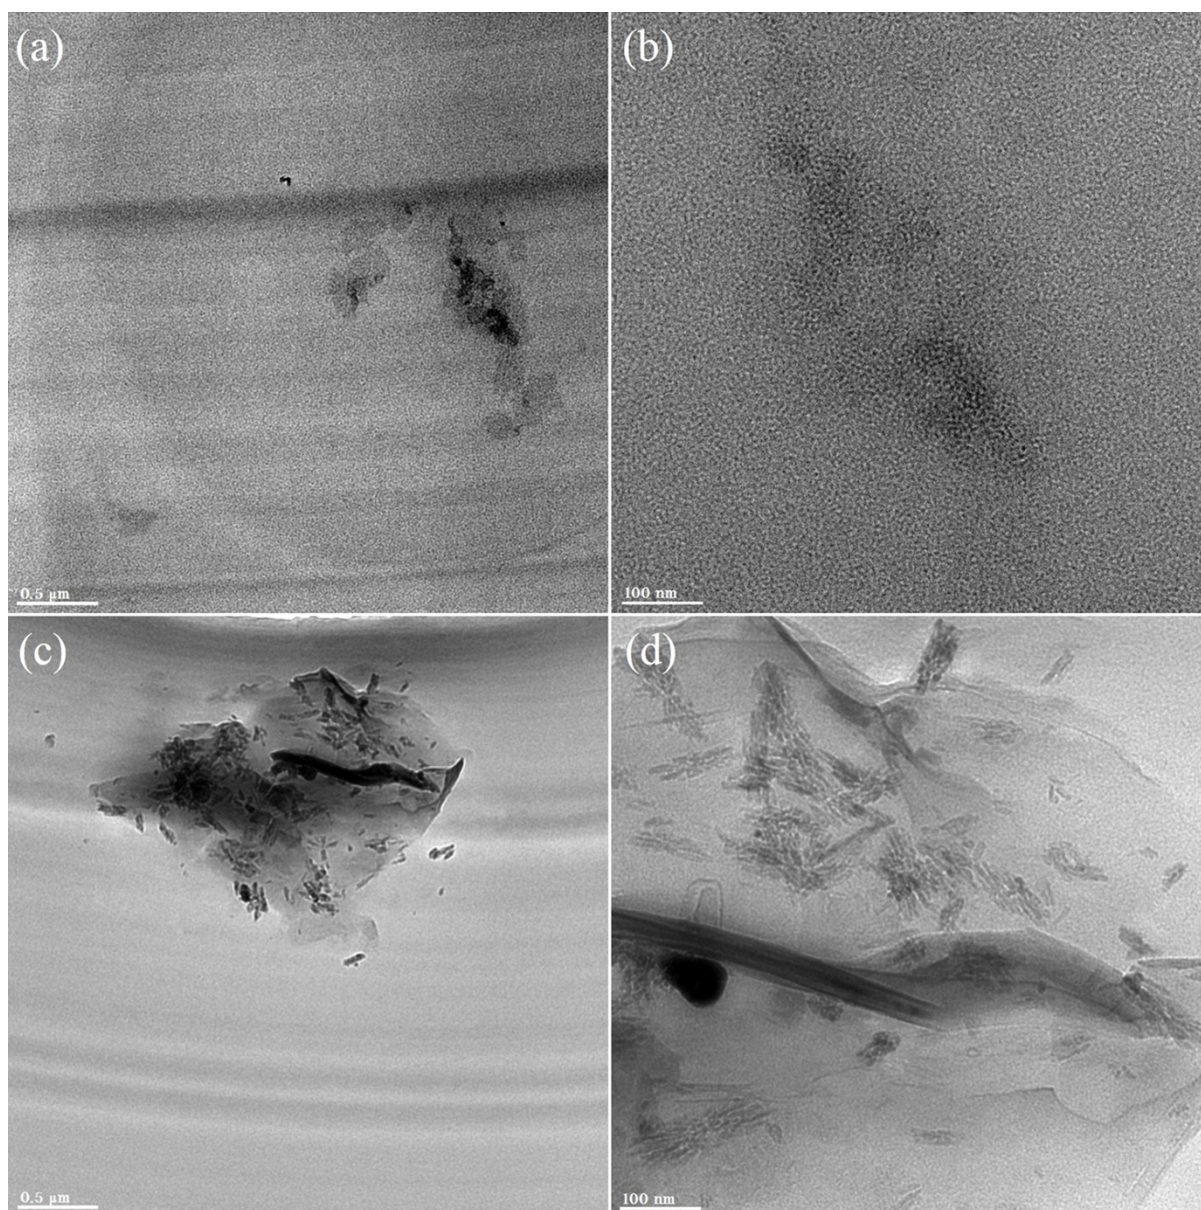

**Fig. S5** HR-TEM images of (a and b) SATPGO<sub>2</sub> (0.25 wt%)/epoxy, (c and d) SATPGO<sub>2</sub> (1 wt%)/epoxy.

**Table S1:** TGA data of SiO<sub>2</sub>, SA, SAT, GO, SATPGO<sub>1</sub>, SATTGO<sub>2</sub>, SATTGO<sub>3</sub>, pure epoxy, SATPGO<sub>1</sub> (0.5 wt%)/epoxy, SATPGO<sub>2</sub> (0.5 wt%)/epoxy, and SATTGO<sub>3</sub> (0.5 wt%)/epoxy studied under N<sub>2</sub> and air atmosphere

| Sample                                 | Degradation temperature (°C)<br>at 5% weight loss |       | Degradation temperature (°C)<br>at 15% weight loss |       | Degradation temperature (°C)<br>at 25% weight loss |       |
|----------------------------------------|---------------------------------------------------|-------|----------------------------------------------------|-------|----------------------------------------------------|-------|
|                                        | N <sub>2</sub>                                    | Air   | N <sub>2</sub>                                     | Air   | N <sub>2</sub>                                     | Air   |
| SiO <sub>2</sub>                       | 451                                               | ----- | -----                                              | ----- |                                                    |       |
| SA                                     | 243                                               | ----- | 525                                                | ----- | 692                                                | ----- |
| SAT                                    | 146                                               | ----- | 364                                                | ----- | 475                                                | ----- |
| GO                                     | 104                                               | ----- | 189                                                | ----- | 211                                                | ----- |
| SATPGO <sub>1</sub>                    | 107                                               | ----- | 388                                                | ----- | 508                                                | ----- |
| SATTGO <sub>2</sub>                    | 189                                               | ----- | 466                                                | ----- | 592                                                | ----- |
| SATTGO <sub>3</sub>                    | 128                                               | ----- | 449                                                | ----- | 575                                                | ----- |
| pure epoxy                             | 342                                               | 332   | 355                                                | 369   | 360                                                | 374   |
| SATPGO <sub>1</sub> (0.5<br>wt%)/epoxy | 344                                               | 332   | 355                                                | 371   | 359                                                | 375   |
| SATPGO <sub>2</sub> (0.5<br>wt%)/epoxy | 347                                               | 350   | 357                                                | 371   | 361                                                | 375   |
| SATTGO <sub>3</sub> (0.5<br>wt%)/epoxy | 345                                               | 346   | 356                                                | 370   | 361                                                | 374   |
